# Supplementary material
Source: PubMed Central journal article supplement (PMC6508099)
Supplement: NIHMS1524086-supplement-Online_Data_Supplement.pdf [file NIHMS1524086-supplement-Online_Data_Supplement.pdf]

## Online Data Supplement

### **PROTEASOME LEVELS AND ACTIVITY IN PREGNANCIES COMPLICATED BY SEVERE PREECLAMPSIA AND HELLP SYNDROME**

Kathryn Berryman MD<sup>1\*</sup>, Catalin S. Buhimschi MD, MBA<sup>1,2†</sup>, Guomao Zhao BSc<sup>3†</sup>,  
Michelle Axe BA<sup>3</sup>, Megan Locke BA<sup>3</sup>, Irina A. Buhimschi MD, MMS<sup>2,3†</sup>

<sup>1</sup> Department of Obstetrics and Gynecology, The Ohio State University College of Medicine, Columbus, Ohio 43210

<sup>2</sup> Department of Pediatrics, The Ohio State University College of Medicine, Columbus, Ohio 43215

<sup>3</sup> Center for Perinatal Research, The Research Institute at Nationwide Children's Hospital, Columbus, Ohio 43215

Current affiliation: \* Department of Obstetrics and Gynecology, Brooke Army Medical Center, Fort Sam Houston, Texas 78234; †Department of Obstetrics and Gynecology, University of Illinois at Chicago College of Medicine, Chicago, Illinois 60612

Correspondence to: Dr. Irina A. Buhimschi, Department of Obstetrics & Gynecology, University of Illinois at Chicago College of Medicine, Chicago, Illinois 60612. E-mail: [irina@uic.edu](mailto:irina@uic.edu)

## **Contents**

**Table S1. Demographic clinical and outcome characteristics of pregnant women who participated with plasma samples (n=150)**

**Figure S1. Model of circulating and extra-cellular constitutive proteasomes and immunoproteasomes.**

**Figure S2. Clinical classification of study participants.**

**Figure S3. Maternal plasma levels of circulating proteasome in pregnant controls compared with non-pregnant controls, spontaneous preterm birth, and hypertensive conditions of pregnancy.**

**Figure S4. Maternal plasma circulating cytokine profile.**

**Figure S5. Levels of circulating immunoproteasome measured through  $\beta 5i$  subunit.**

**Figure S6. Quantification of  $\beta 5$  and  $\beta 5i$  immunostaining in placenta.**

**Table S1. Demographic clinical and outcome characteristics of pregnant women who participated with plasma samples (n=150)**

| Variable                                              | P-CRL<br>n = 14  | sPTB<br>n=21     | crHTN<br>n = 25  | gHTN<br>n = 25   | mPE<br>n=10      | sPE<br>n=39       | HELLP<br>n=16   | P value          |
|-------------------------------------------------------|------------------|------------------|------------------|------------------|------------------|-------------------|-----------------|------------------|
| <b>Maternal characteristics at enrollment</b>         |                  |                  |                  |                  |                  |                   |                 |                  |
| Age, years *                                          | 29 [25-30]       | 25 [22-29]       | 31 [28-36]       | 30 [25-33]       | 30 [23-32]       | 30 [24-34]        | 29 [25-32]      | 0.074            |
| Gravidity *                                           | 2 [1-3]          | 2 [1-4]          | 3 [2-5]          | 2 [1-2]          | 2 [1-3]          | 2 [1-3]           | 2 [1-3]         | <b>0.044</b>     |
| Parity *                                              | 1 [0-1]          | 1 [0-2]          | 2 [0-4]          | 0 [0-1]          | 0 [0-2]          | 0 [0-2]           | 0 [0-1]         | <b>0.010</b>     |
| GA, weeks *                                           | 29 [25-30]       | 29 [27-32]       | 37 [36-38]       | 38 [37-39]       | 36 [33-37]       | 31 [28-34]        | 28 [25-31]      | <b>&lt;0.001</b> |
| Race/ethnicity †                                      |                  |                  |                  |                  |                  |                   |                 |                  |
| White                                                 | 10 (71)          | 0 (0)            | 12 (48)          | 20 (80)          | 7 (70)           | 20 (51)           | 11 (69)         | <b>&lt;0.001</b> |
| African - American                                    | 4 (29)           | 5 (24)           | 10 (40)          | 4 (16)           | 3 (30)           | 13 (33)           | 3 (19)          |                  |
| Hispanic                                              | 0 (0)            | 16 (76)          | 1 (4)            | 0 (0)            | 0 (0)            | 3 (8)             | 2 (12)          |                  |
| Peak systolic BP *                                    | 115 [110-125]    | 130 [124-143]    | 171 [150-177]    | 155 [147-165]    | 144 [141-156]    | 165 [154-183]     | 163 [151-182]   | <b>&lt;0.001</b> |
| Peak diastolic BP *                                   | 64 [60-70]       | 80 [71-89]       | 96 [88-106]      | 95 [91-101]      | 85 [82-92]       | 100 [92-108]      | 100 [92-107]    | <b>&lt;0.001</b> |
| Proteinuria, mg *                                     | na               | na               | 192 [125-264]    | 286 [183-293]    | 441 [353-1035]   | 5,600 [1683-8966] | 1275 [247-4685] | <b>&lt;0.001</b> |
| <b>Maternal and Fetal characteristics at delivery</b> |                  |                  |                  |                  |                  |                   |                 |                  |
| GA, at delivery                                       | 39 [38-39]       | 31 [28-32]       | 38 [37-39]       | 38 [37-39]       | 37 [37-38]       | 31 [28-35]        | 28 [24-31]      | <b>&lt;0.001</b> |
| Birth weight, grams *                                 | 3335 [3102-3500] | 1445 [1310-1944] | 3238 [2570-3505] | 3230 [2852-3624] | 3184 [2755-3817] | 1405 [960-2140]   | 883 [545-1735]  | <b>&lt;0.001</b> |
| Cesarean Delivery †                                   | 3 (21)           | 8 (38)           | 8 (32)           | 6 (24)           | 5 (50)           | 30 (77)           | 13 (81)         | <b>&lt;0.001</b> |
| Newborn Sex †                                         |                  |                  |                  |                  |                  |                   |                 |                  |
| male                                                  | 5 (36)           | 15 (71)          | 13 (52)          | 9 (36)           | 7 (70)           | 18 (46)           | 6 (38)          | 0.647            |

\* Data presented as median [interquartile range] and analyzed by Kruskal-Wallis ANOVA on Ranks.

† Data presented as n (%) and analyzed by  $\chi^2$  tests.

Significant P values are shown in bold.

*P-CRL indicates pregnant control; sPTB, idiopathic spontaneous preterm birth; crHTN, chronic hypertension; gHTN, gestational hypertension; mPE, preeclampsia without severe clinical features; sPE, preeclampsia with severe clinical features; HELLP, hemolysis, elevated liver enzymes, low platelet count; GA, gestational age; BP, blood pressure*

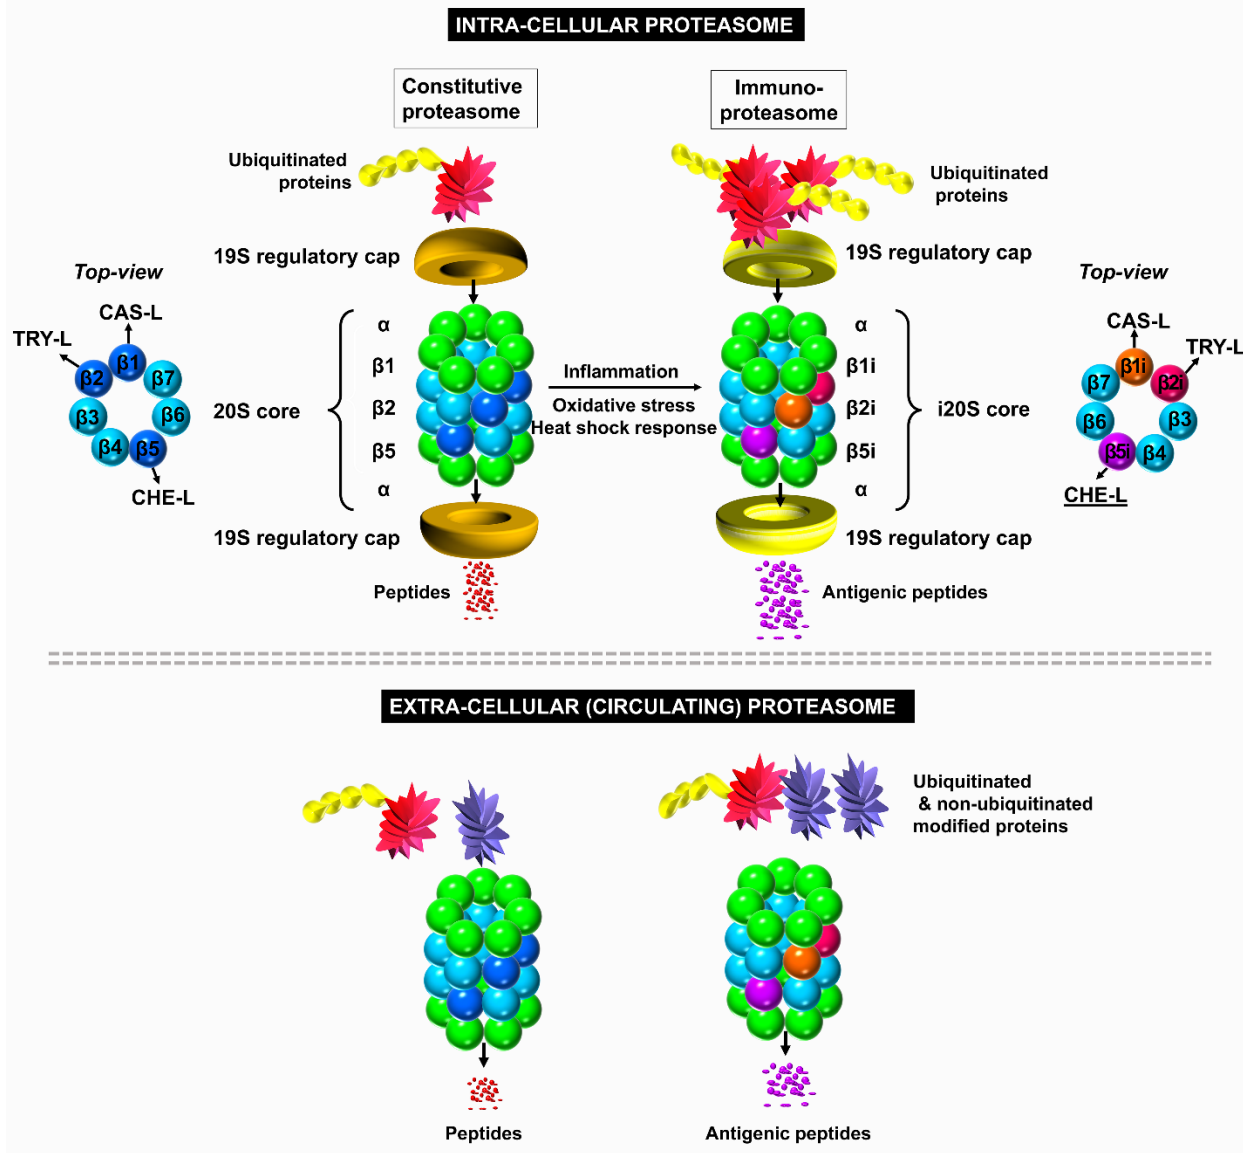

**Figure S1. Model of circulating and extra-cellular constitutive proteasomes and immuno-proteasomes.**

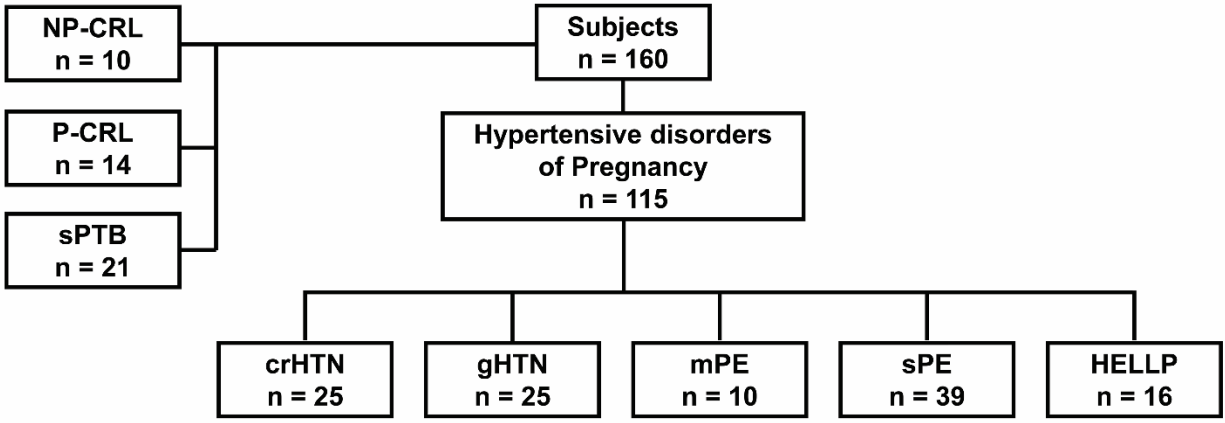

**Figure S2. Clinical classification of study participants.** NP-CRL, non-pregnant control; P-CRL, healthy pregnant control; sPTB, idiopathic spontaneous preterm birth; crHTN, chronic hypertension; gHTN, gestational hypertension, mPE, preeclampsia without severe clinical features; sPE, preeclampsia with severe clinical features; HELLP, hemolysis, elevated liver enzymes, and thrombocytopenia syndrome.

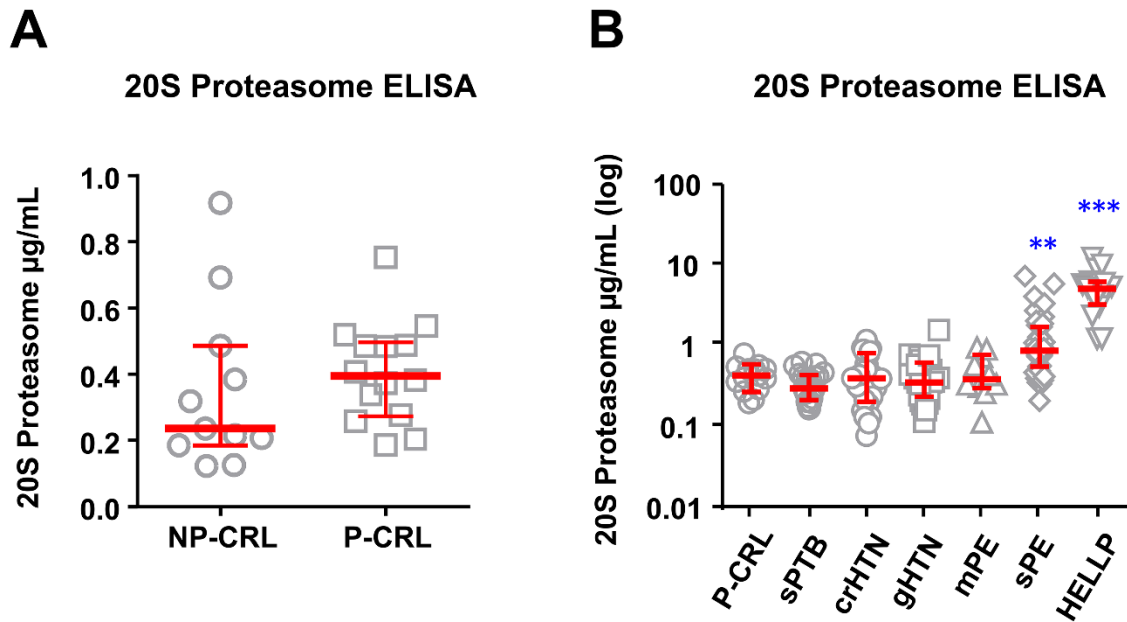

**Figure S3. Maternal plasma levels of circulating proteasome in pregnant controls compared with non-pregnant controls, spontaneous preterm birth, and hypertensive conditions of pregnancy. A,** Circulating proteasome immunoreactivity in healthy pregnant controls during second and third trimester (P-CRL,  $n=14$ ) compared to non-pregnant controls (NP-CRL,  $n=10$ ). **B,** Circulating proteasome immunoreactivity in P-CRL compared with women with idiopathic spontaneous preterm birth (sPTB,  $n=21$ , chronic hypertension (crHTN,  $n=25$ ), gestational hypertension (gHTN,  $n=25$ ), preeclampsia without severe clinical feature (mPE,  $n=10$ ), preeclampsia with severe clinical features (sPE,  $n=39$ ), and sPE and clinical features of HELLP syndrome (HELLP,  $n=16$ ) (**B**). Data are presented as median (horizontal line) and interquartile range (vertical bars). Kruskal-Wallis analysis of variance followed by multiple comparisons with Dunn's tests. \*\*  $P<0.01$ , \*\*\*  $P<0.001$  vs P-CRL group.

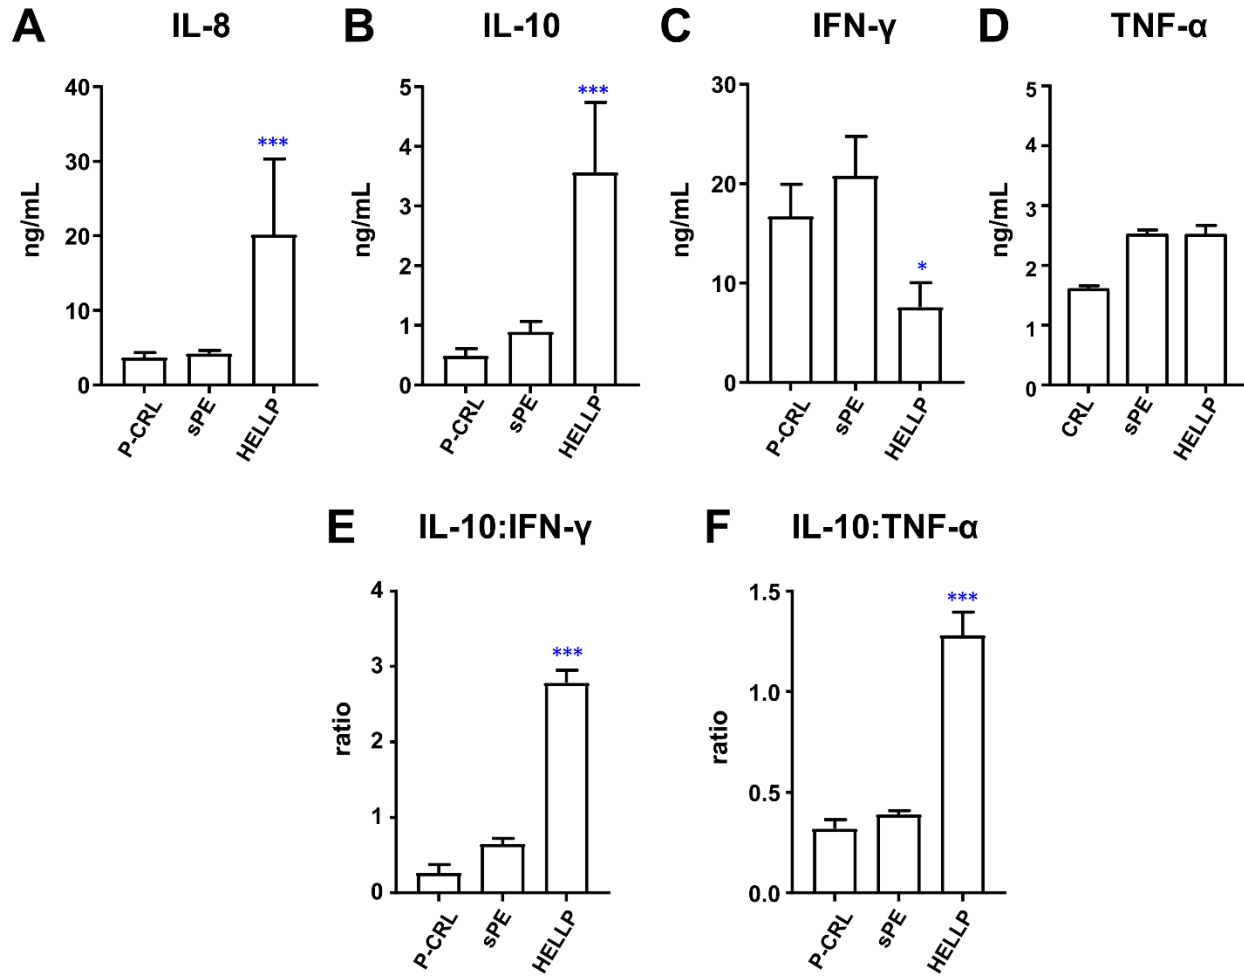

**Figure S4. Maternal plasma circulating cytokine profile.** Levels of (A) interleukin (IL)-8, (B) IL-10, (C) interferon (IFN)- $\gamma$ , and (D) tumor necrosis factor (TNF)- $\alpha$  in pregnant controls (P-CRL, n=14), women with preeclampsia with severe clinical features (sPE, n=39), and women with HELLP syndrome (n=16). Ratio of (E) IL-10:IFN- $\gamma$ , and (F) IL-10:TNF- $\alpha$  in the same groups. Data are presented as mean + standard error mean (vertical bars). 1-way analysis of variance on log-transformed data followed by multiple comparisons with Holm-Sidak tests. \*  $P < 0.05$ , \*\*\*  $P < 0.001$  vs P-CRL.

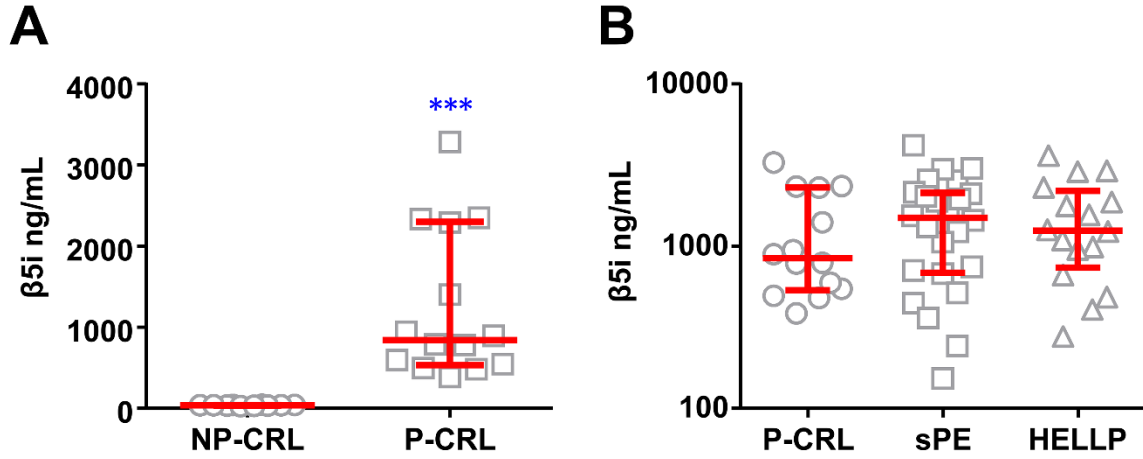

**Figure S5. Levels of circulating immunoproteasome measured through  $\beta 5i$  subunit. A,** Plasma  $\beta 5i$  concentration in non-pregnant controls (NP-CRL, n=10) versus pregnant controls (P-CRL, n=14). Mann-Whitney Rank Sum Test \*  $P < 0.05$  vs NP-CRL. **B,** Circulating proteasome immunoreactivity in pregnant controls (P-CRL, n=14) compared with women with preeclampsia with severe clinical features (sPE, n=39) and women with HELLP syndrome (n=16). Data are presented as median (horizontal line) and interquartile range (vertical bars). No significant differences were noted among groups.



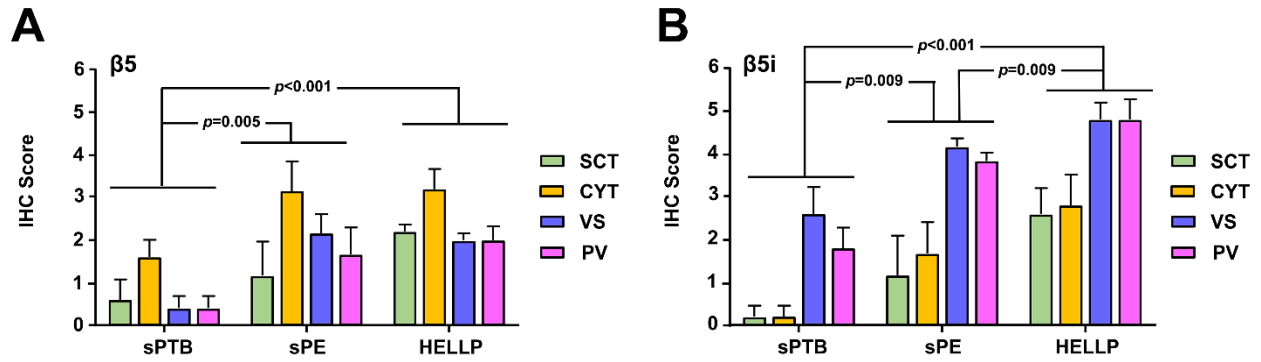

**Figure S6. Quantification of  $\beta 5$  and  $\beta 5i$  immunostaining in placenta.** Semi-quantitative scoring of (A)  $\beta 5$  and (B)  $\beta 5i$  staining intensity in syncytiotrophoblast (SCT), villous cytotrophoblast (CYT), villous stroma (VS), and placental vasculature (PV) in women with spontaneous preterm birth (sPTB, 32 weeks, n=4), preeclampsia with severe features (sPE, 32 weeks, n=6), and HELLP syndrome (30 weeks, n=5). Staining intensity was scored from 3 random fields per slide in a blinded fashion on a scale from 0 (absent) to 5 (intense).
